# Supplementary material
Source: ML conference proceedings conference paper supplement (https://proceedings.neurips.cc/paper_files/paper/2016/hash/8d317bdcf4aafcfc22149d77babee96d-Abstract.html)
Supplement: Supplementary file [file 8d317bdcf4aafcfc22149d77babee96d-Supplemental.zip]

**SM-A Showing that there are more first time visits than revisits in the first epoch**

Let the probability that a sample is not visited in an epoch be  $p$ , where recall that an epoch consists of drawing  $N/b$  mini-batches, where we assume  $N \bmod b = 0$ . Denote by  $q$  the probability that the visit of a sample is a revisit. We argue that  $q = p$ : the number of samples not visited exactly corresponds to the number of revisits, as the number of visits is the number of samples, by definition of an epoch. Clearly,  $p = (1 - b/N)^{N/b}$ , from which it can be shown that  $1/4 \leq p < 1/e$ . Thus  $q \leq 1/e$  as we want. In other words, there are at least 1.718 first time visits for 1 revisit.

**SM-B Showing that the expectations  $\|c_{t+1}(j|2b_t) - c_{t+1}(j|b_t)\|^2$  and  $\frac{1}{2}\hat{\sigma}_C^2$  are approximately the same**

Recall that  $\mathcal{M}_t(j)$  are the samples used to obtain  $c_j(t)$ , that is

$$c_t(j) = \frac{1}{|\mathcal{M}_t(j)|} \sum_{i \in \mathcal{M}_t(j)} x(i).$$

The mean squared distance of samples in  $\mathcal{M}_t(j)$  to  $c_j(t)$  we denote by  $\hat{\sigma}_S^2(j)$ ,

$$\hat{\sigma}_S^2(j) = \frac{1}{|\mathcal{M}_t(j)|} \sum_{i \in \mathcal{M}_t(j)} \|x(i) - c_t(j)\|^2.$$

We compute the expectation of  $\|c_{t+1}(j|2b_t) - c_{t+1}(j|b_t)\|^2$ , where the expectation is over all possible shufflings of the data. Recall that  $c_{t+1}(j|2b_t)$  is centroid  $j$  at iteration  $t + 1$  if the mini-batch at size  $t + 1$  is  $2b_t$ , where  $b_t$  is the mini-batch size at iteration  $t$ . Recall that we use  $\mathcal{M}_t(j)$  to denote samples assigned to  $c_t(j)$ . We will now denote by  $\mathcal{M}_{t+1}^{2b_t}(j)$  the sample indices assigned to  $c_{t+1}(j|2b_t)$  and  $\mathcal{M}_{t+1}^{b_t}(j)$  the sample indices assigned to  $c_{t+1}(j|b_t)$ . Thus,

$$\begin{aligned} \mathbb{E}(\|c_{t+1}(j|2b_t) - c_{t+1}(j|b_t)\|^2) &= \\ &= \mathbb{E}\left(\left\|\frac{1}{|\mathcal{M}_{t+1}^{2b_t}(j)|} \sum_{i \in \mathcal{M}_{t+1}^{2b_t}(j)} x(i) - \frac{1}{|\mathcal{M}_{t+1}^{b_t}(j)|} \sum_{i \in \mathcal{M}_{t+1}^{b_t}(j)} x(i)\right\|^2\right) \\ &= \mathbb{E}\left(\left\|\frac{1}{|\mathcal{M}_{t+1}^{2b_t}(j)|} \sum_{i \in \mathcal{M}_{t+1}^{2b_t}(j) \setminus \mathcal{M}_{t+1}^{b_t}(j)} x(i) - \right. \right. \\ &\quad \left. \left. \left(\frac{1}{|\mathcal{M}_{t+1}^{b_t}(j)|} - \frac{1}{|\mathcal{M}_{t+1}^{2b_t}(j)|}\right) \sum_{i \in \mathcal{M}_{t+1}^{b_t}(j)} x(i)\right\|^2\right) \end{aligned}$$

We now assume that the number of samples per centroid does not change significantly between iterations  $t$  and  $t+1$  for a fixed batch size, so that  $|\mathcal{M}_{t+1}^{b_t}(j)| \approx |\mathcal{M}_t(j)|$  and  $|\mathcal{M}_{t+1}^{2b_t}(j)| \approx 2|\mathcal{M}_t(j)|$ . Continuing we have,

$$\begin{aligned} &\approx \frac{1}{4|\mathcal{M}_t(j)|^2} \mathbb{E} \left( \left\| \sum_{i \in \mathcal{M}_{t+1}^{2b_t}(j) \setminus \mathcal{M}_{t+1}^{b_t}(j)} x(i) - \sum_{i \in \mathcal{M}_{t+1}^{b_t}(j)} x(i) \right\|^2 \right) \\ &\approx \frac{1}{4|\mathcal{M}_t(j)|^2} \mathbb{E} \left( \left\| \sum_{i \in \mathcal{M}_{t+1}^{2b_t}(j) \setminus \mathcal{M}_{t+1}^{b_t}(j)} (x(i) - c_t(j)) - \sum_{i \in \mathcal{M}_{t+1}^{b_t}(j)} (x(i) - c_t(j)) \right\|^2 \right) \end{aligned}$$

The two summation terms are independant and the second has expectation approximately zero assuming the centroids do not move too much between rounds, so

$$\begin{aligned} &\approx \frac{1}{4|\mathcal{M}_t(j)|} \left( \mathbb{E} \left( \frac{1}{|\mathcal{M}_t(j)|} \left\| \sum_{i \in \mathcal{M}_{t+1}^{2b_t}(j) \setminus \mathcal{M}_{t+1}^{b_t}(j)} (x(i) - c_t(j)) \right\|^2 \right) + \right. \\ &\quad \left. \mathbb{E} \left( \frac{1}{|\mathcal{M}_t(j)|} \left\| \sum_{i \in \mathcal{M}_{t+1}^{b_t}(j)} (x(i) - c_t(j)) \right\|^2 \right) \right) \end{aligned}$$

Finally, each of the two expectation terms can be approximated by  $\hat{\sigma}_S^2(j)$ . Approximating the first term by  $\hat{\sigma}_S^2(j)$ , may be an underestimation as the summation is over data which was not used to obtain  $c_t(j)$ , whereas  $\hat{\sigma}_S^2(j)$  is obtained using data used by  $c_t(j)$ . Using this estimation we get,

$$\begin{aligned} &\approx \frac{1}{2|\mathcal{M}_t(j)|} \hat{\sigma}_S^2(j), \\ &= \frac{1}{2|\mathcal{M}_t(j)|^2} \sum_{i \in \mathcal{M}_t(j)} \|x(i) - c_t(j)\|^2, \\ &= \frac{1}{2} \hat{\sigma}_C^2(j). \end{aligned}$$

The final equality following from the definition of  $\hat{\sigma}_C^2(j)$ .

## SM-C Time-energy curves with various doubling thresholds

Figures 4 and 5 show the full time-energy curves for various values of the doubling threshold  $\rho$ , for the cases where bounds are used and deactivated respectively.

## SM-D On algorithms intermediate to `mbatch` and `nmbatch`

The primary argument presented in this paper for removing old assignments is to prevent a biased use of samples in `nmbatch`. However, a second reason for removing old assignments is that they can contaminate centroids if left unremoved. This second reason in favour of removing old assignments is also applicable to `mbatch`, and so it is interesting to see if `mbatch` can be improved by removing old assignments, without the inclusion of triangle inequality based bounds. We call this algorithm `mbatch.remove`. In addition, it is interesting to consider the performance of `nmbatch` without bound testing. We here call `nmbatch` without bound testing `nmbatch.deact`.

In Figure 6 we see that `mbatch` is indeed improved by removing old assignments: `mbatch.remove` outperforms `mbatch`, especially at later iterations. The algorithm `nmbatch.deact` does not perform

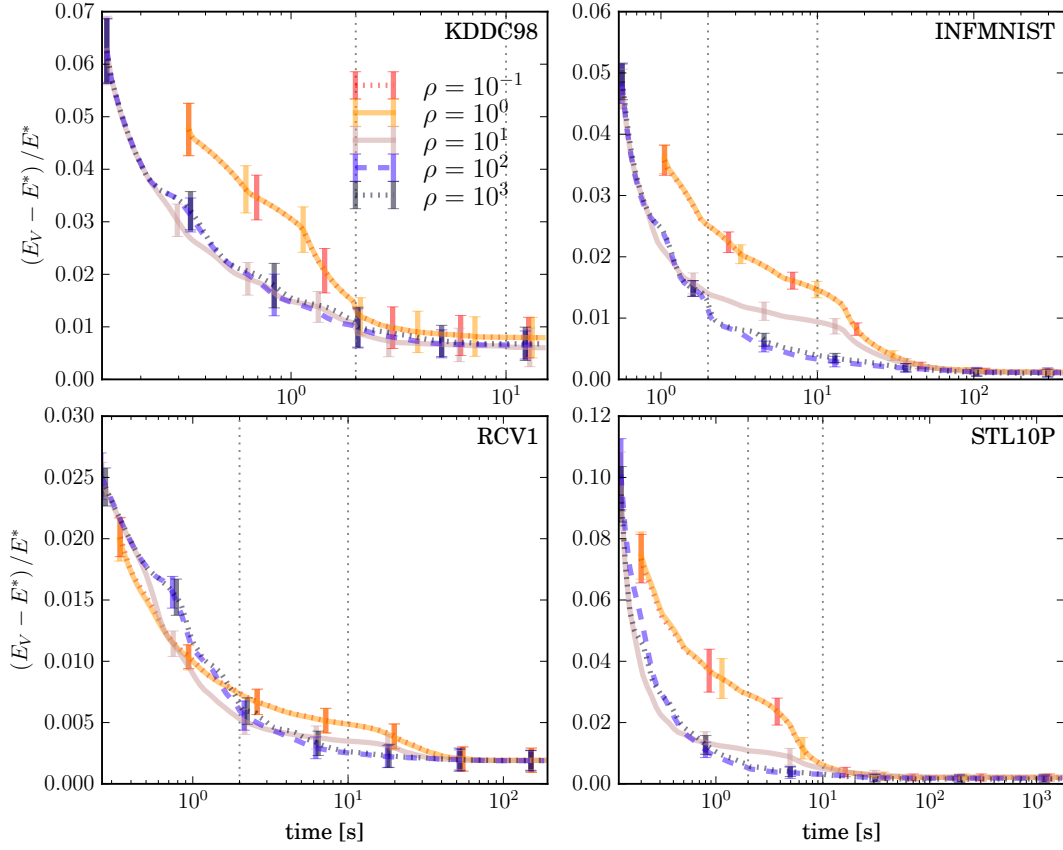

Figure 4: Time-energy curves for `nmbatch` with various  $\rho$ . The dotted vertical lines correspond to the time slices presented in Figure 2. We see that large  $\rho$  works best, with very little difference between  $\rho = 10^2$  and  $\rho = 10^3$ .

as well as `nmbatch`, as expected, however it is comparable to `mbatch.remove`, if not slightly better. There is no algorithmic reason why `nmbatch.deact` should be better than `mbatch.remove`, as nesting was proposed purely as way to better harness bounds. One possible explanation for the good performance of `nmbatch.deact` is better memory usage: when samples are reused there are fewer cache memory misses.

### SM-E Premature fine-tuning, one more time please

The loss function being minimised changes when the mini-batch grows. With  $b_t$  samples, it is

$$E(\mathcal{C}) = \frac{1}{b_t} \sum_{i=1}^{b_t} \arg \min_{j \in \{1, \dots, k\}} \|x(i) - c(j)\|^2,$$

and then with  $2b_t$  it is

$$E(\mathcal{C}) \frac{1}{2b_t} \sum_{i=1}^{2b_t} \arg \min_{j \in \{1, \dots, k\}} \|x(i) - c(j)\|^2.$$

Minima of these two loss functions are different, although as  $b_t$  gets large they approach each other. Premature fine-tuning refers to putting a large amount of effort into getting very close to a minimum with  $b_t$  samples, when we know that as soon as we switch to  $2b_t$  samples the minimum will move, undoing our effort to get very close to a minimum.

Coffee break definition: It's like a glazed cherry without a cake, that finishing touch which is useless until the main project is complete. Donald Knuth once wrote that *premature optimization is the*

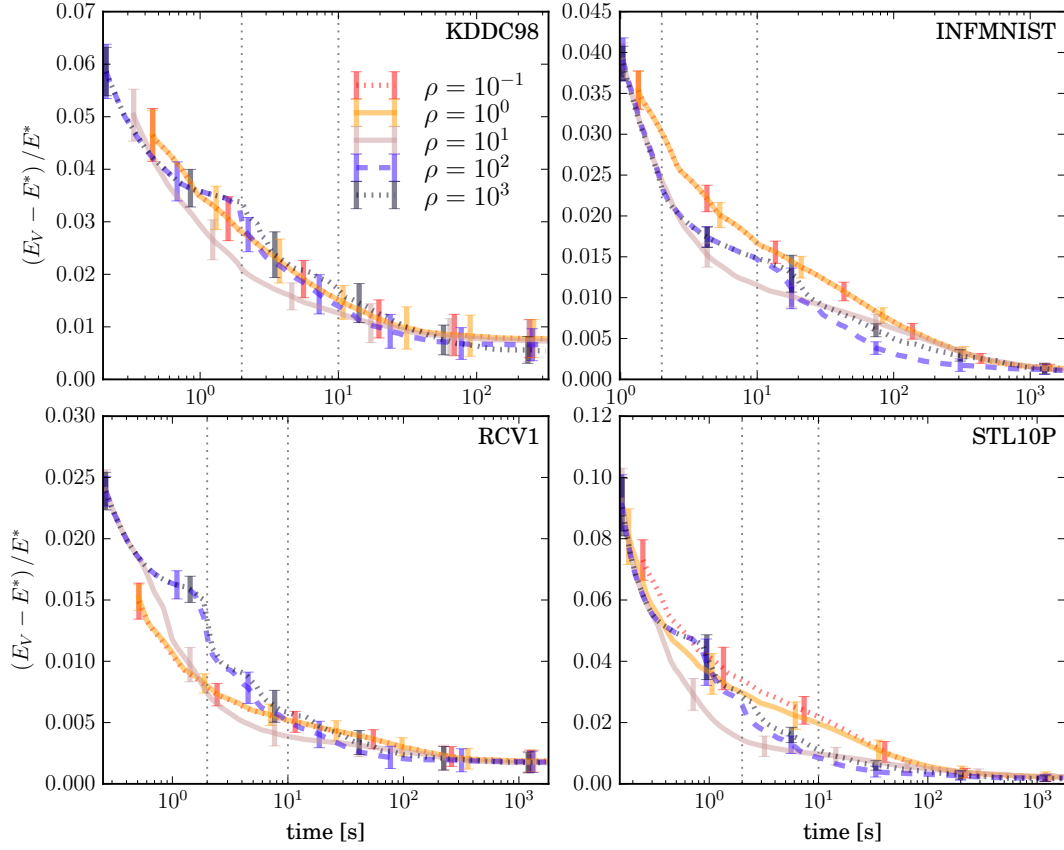

Figure 5: Time-energy curves for `nmbatch` with bounds disabled. The dotted vertical lines correspond to the time slices presented in Figure 2, that is  $t = 2s$  and  $t = 10s$ . We see that with bounds disabled,  $\rho = 10^1$  in general outperforms  $\rho \in \{10^2, 10^3\}$ , providing empirical support for the proposed doubling scheme.

*root of all evil*, where optimisations to code performed too early on in a project become useless as software evolves. This is roughly what we’re talking about.

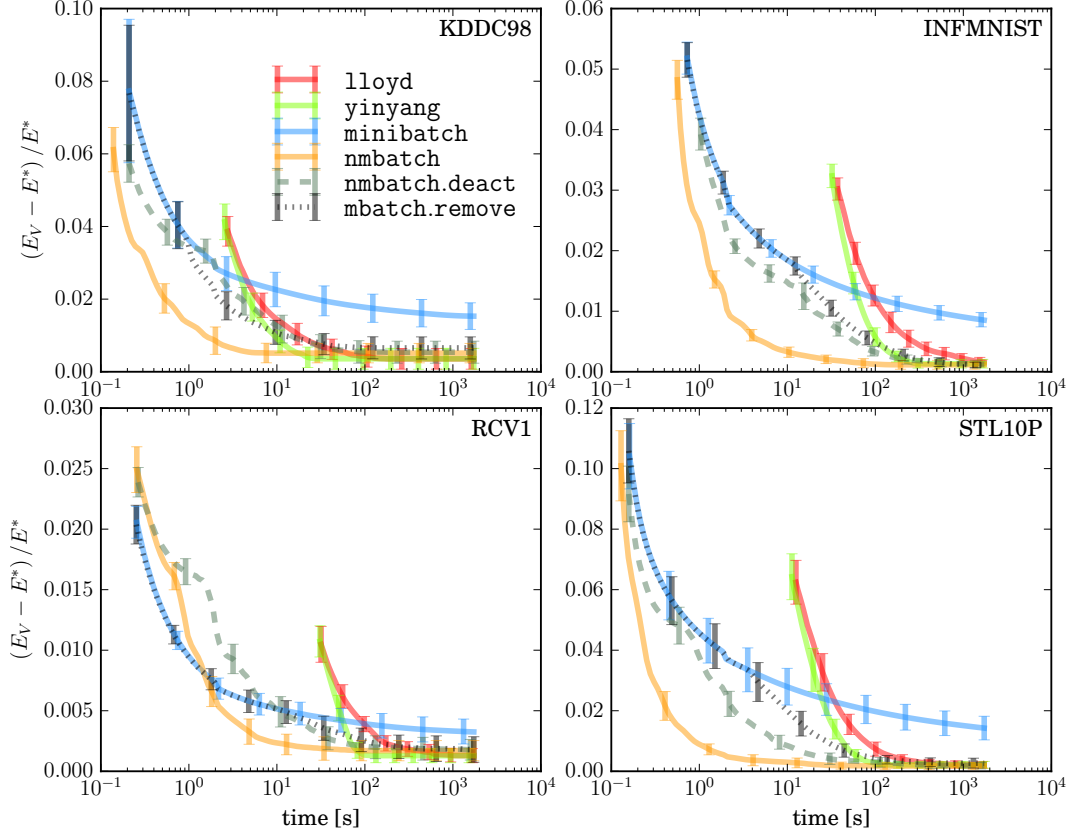

Figure 6: Performace of algorithms intermediate to nmbatch and mbatch. The intermediate algorithms are : nmbatch.deact, which is nmbatch with the bound test deactivated, and mbatch.remove, which is mbatch with the removal of old assignments. nmbatch and nmbatch.deact are with  $\rho = 100$  as usual. We observe that, as expected, deactivation of the bound test results in a significant slow-down of nmbatch. We also observe that the removal of old assignments significantly improves mbatch, especially at later iterations.
